# Supplementary material for: Differential Analysis of the Nasal Microbiome of Pig Carriers or Non-Carriers of Staphylococcus aureus
Source: PubMed Central journal article supplement (PMC4980049; doi:10.1371/journal.pone.0160331), 2016-08-10
Supplement: pone.0160331.s001.pdf [file pone.0160331.s001.pdf]

### Unclassified *Vagococcus*

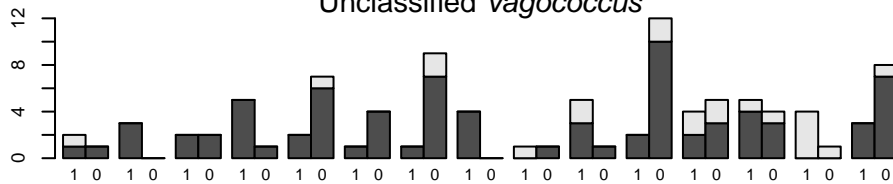

### Unclassified *Wautersiella*

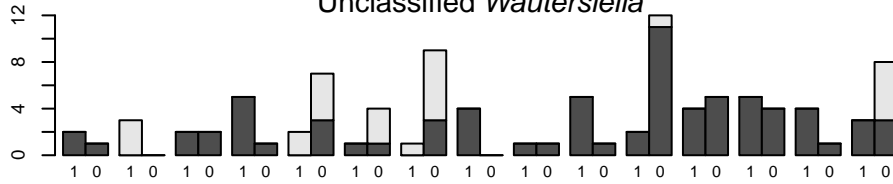

### *Vagococcus fluvialis*

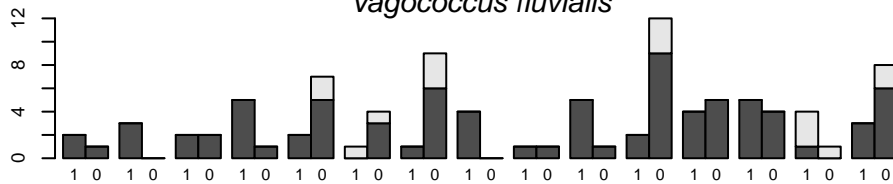

### *Pasteurella multocida*

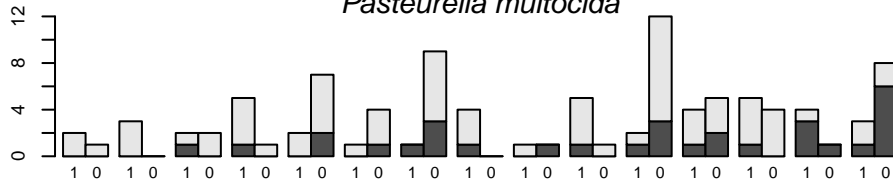

### Unclassified *Klebsiella*

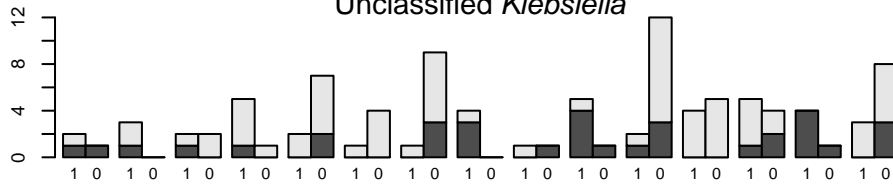

Farm 1 2 3 4 5 6 7 8 9 10 11 12 13 14 15
