# Supplementary material for: Differential Analysis of the Nasal Microbiome of Pig Carriers or Non-Carriers of Staphylococcus aureus
Source: PubMed Central journal article supplement (PMC4980049; doi:10.1371/journal.pone.0160331), 2016-08-10
Supplement: pone.0160331.s002.pdf [file pone.0160331.s002.pdf]

*Acinetobacter Iwoffii*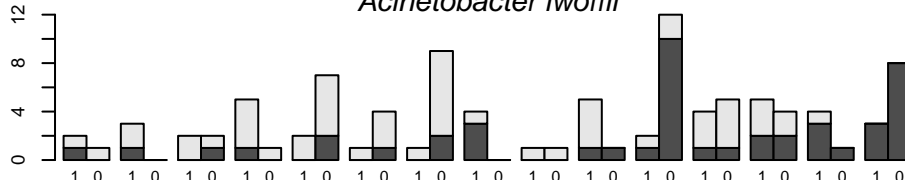*Acinetobacter soli*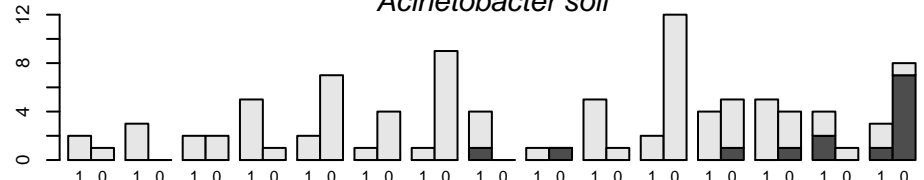*Anaerococcus lactolyticus*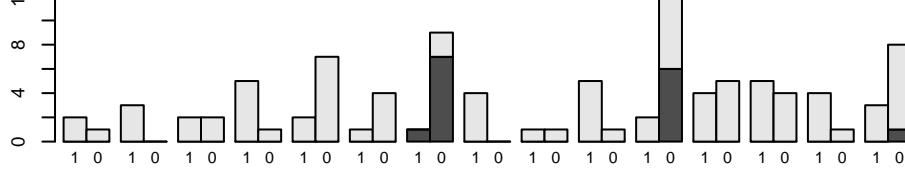*Facklamia tabacinasalis*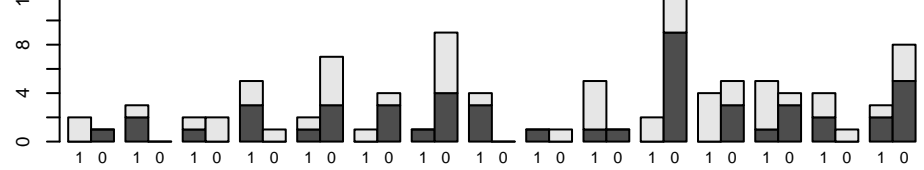*Kurthia gibsonii*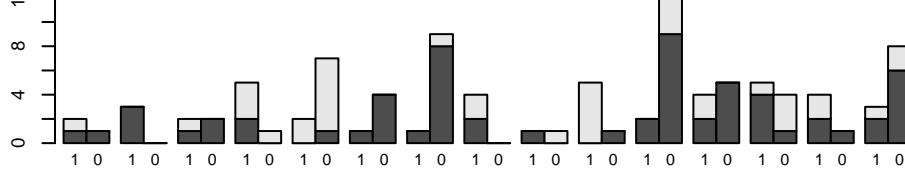*Leuconostoc mesenteroides*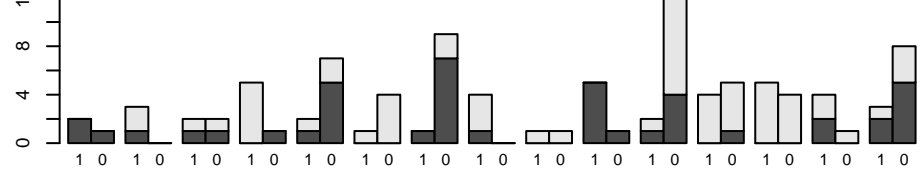*Leuconostoc pseudomesenteroides*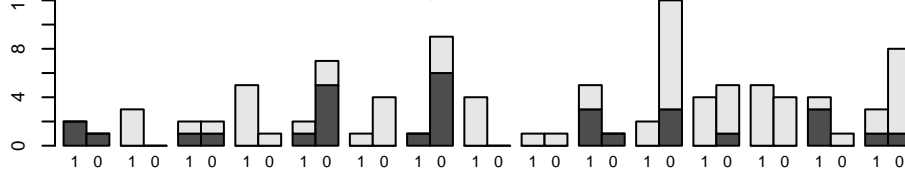*Moraxella boevrei*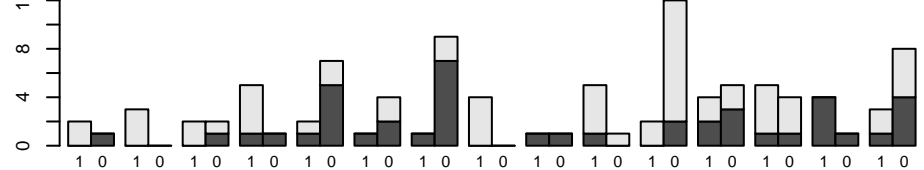Unclassified *Acinetobacter*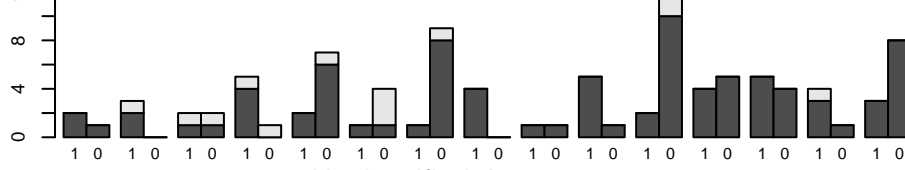Unclassified *Aerococcaceae*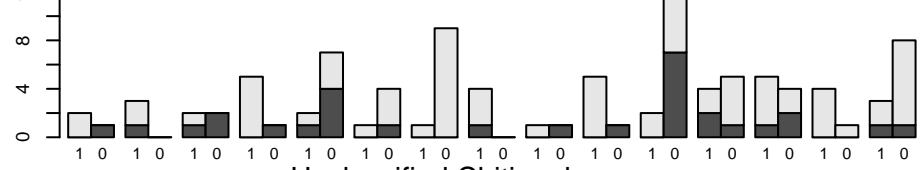Unclassified *Anaerococcus*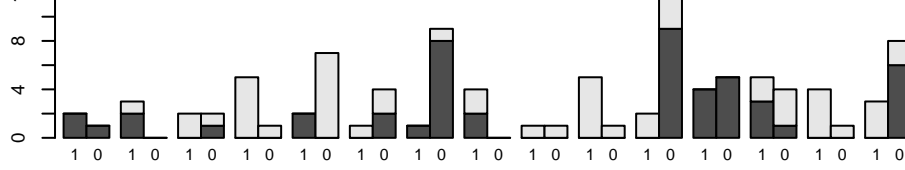Unclassified *Chitinophagaceae*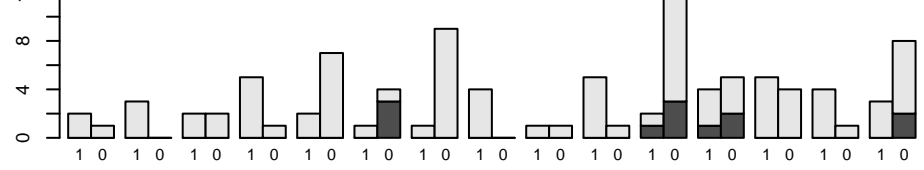Unclassified *Facklamia*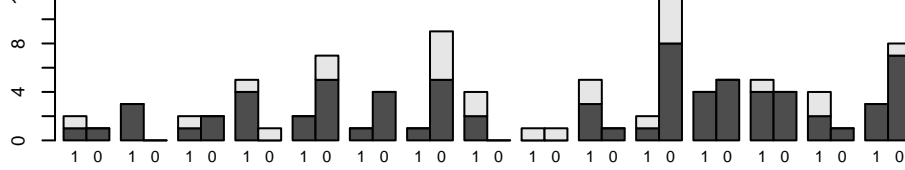Unclassified *Faecalibacterium*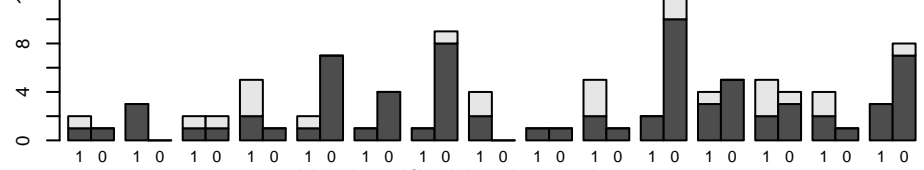Unclassified *Helcococcus*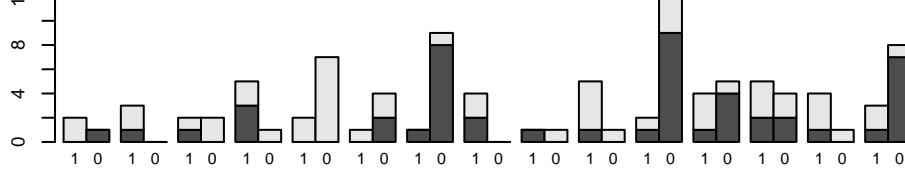Unclassified *Lachnospiraceae*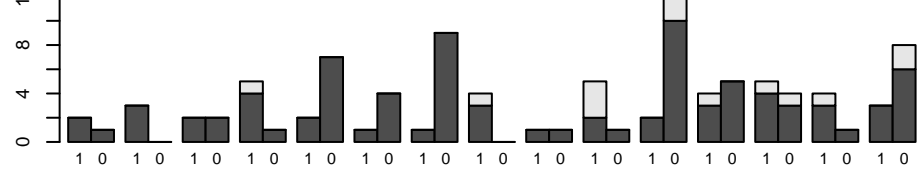Unclassified *Oscillibacter*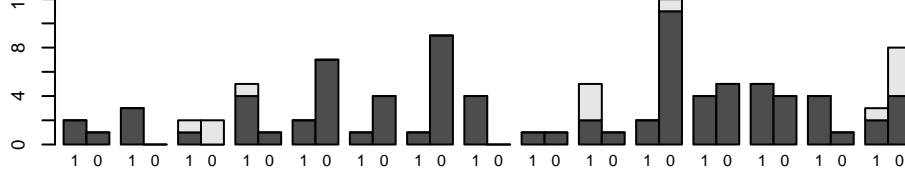Unclassified *Prevotella*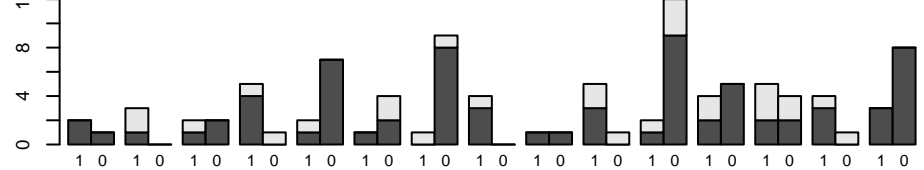Unclassified *Roseburia*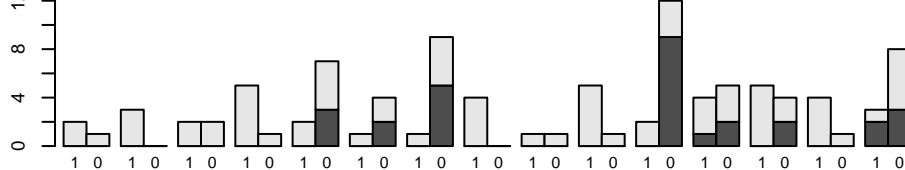Unclassified *Porphyromonadaceae*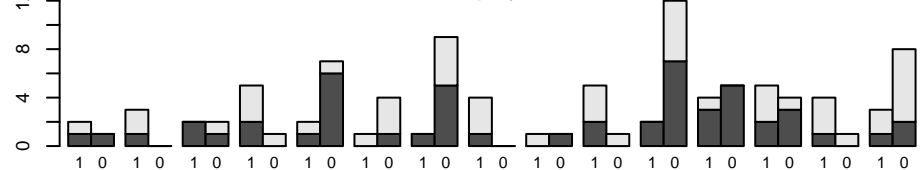

Farm 1 2 3 4 5 6 7 8 9 10 11 12 13 14 15

1 2 3 4 5 6 7 8 9 10 11 12 13 14 15
